# Supplementary material for: Unveiling role of sphingosine-1-phosphate receptor 2 as a brake of epithelial stem cell proliferation and a tumor suppressor in colorectal cancer
Source: PubMed Central journal article supplement (PMC7682101; doi:10.1186/s13046-020-01740-6), 2020-11-23

Supplementary Figure 3

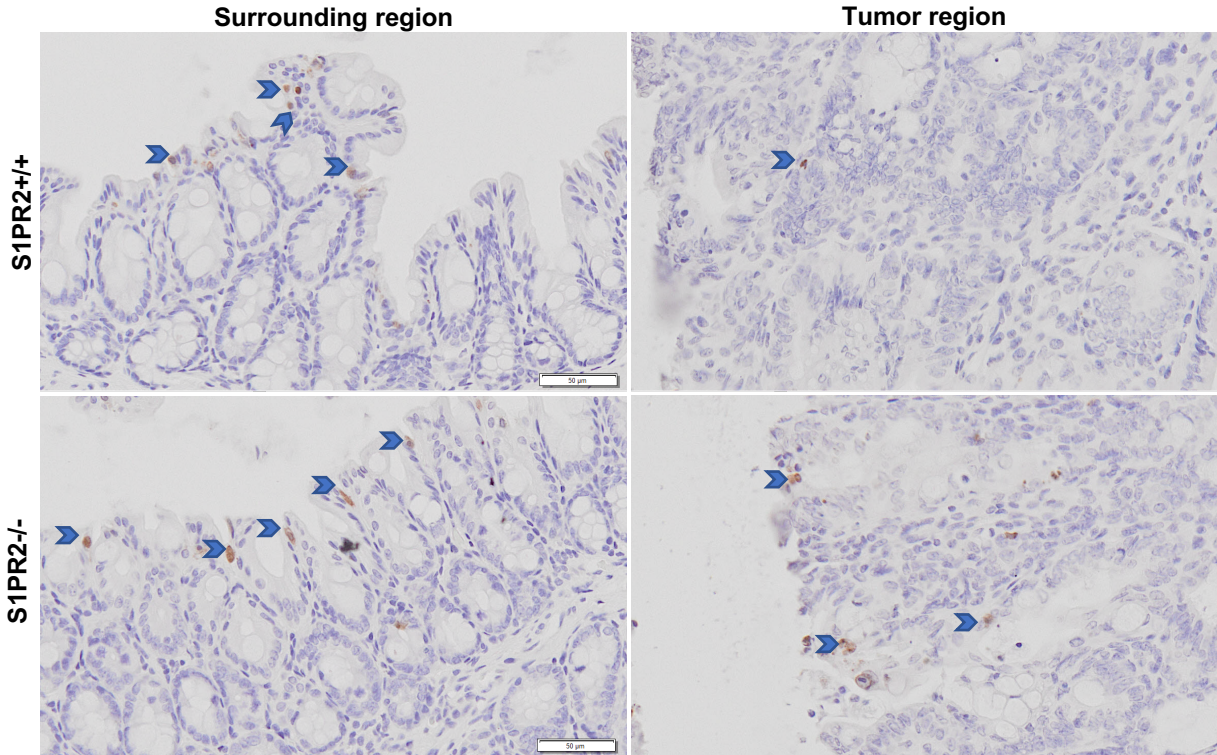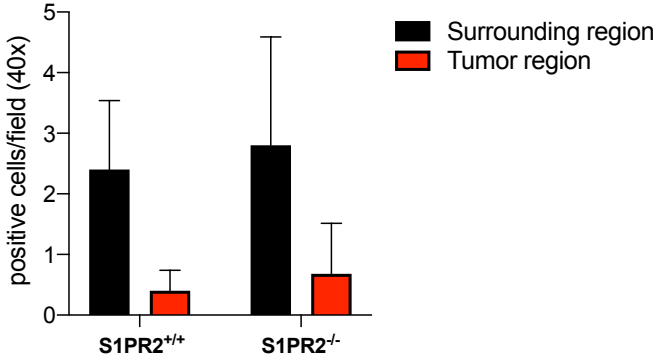

Supplement: 13046_2020_1740_MOESM3_ESM.pdf [file 13046_2020_1740_MOESM3_ESM.pdf]
