# Supplementary material for: Unveiling role of sphingosine-1-phosphate receptor 2 as a brake of epithelial stem cell proliferation and a tumor suppressor in colorectal cancer
Source: Springer Nature journal article supplement (doi:10.1186/s13046-020-01740-6), 2020-11-23

## Supplementary Figure 5

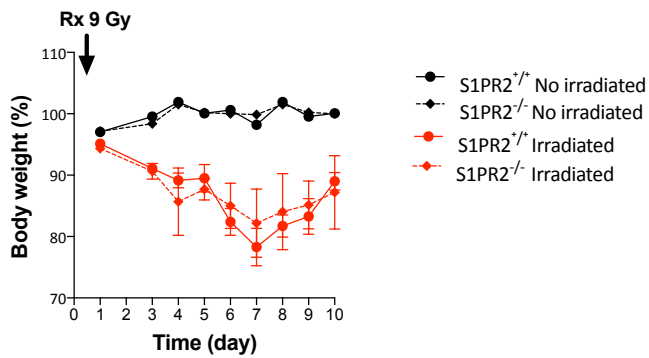

Supplement: MOESM5 [file 18615932]
